# Supplementary material
Source: PubMed Central journal article supplement (PMC3315231)
Supplement: supp_tpc.111.093005_93005Supplemental_Data.pdf [file supp_tpc.111.093005_93005Supplemental_Data.pdf]

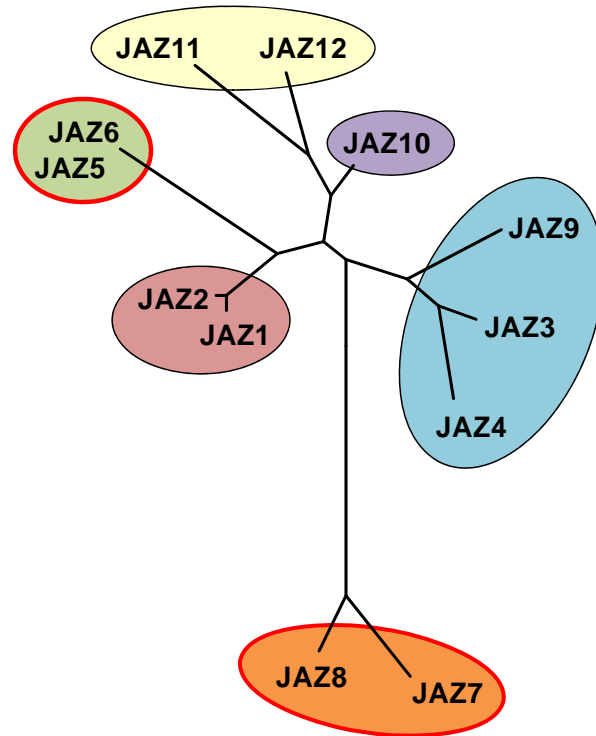

**Supplemental Figure 1. Phylogenetic Tree Constructed from the Jas Motif of Arabidopsis JAZ Proteins.**

The 27-amino-acid Jas motif in all 12 Arabidopsis JAZ proteins was aligned with MUSCLE (Edgar, 2004). The phylogenetic tree was generated with the Neighbor-joining method using MEGA5 software (<http://www.megasoftware.net>). Red circles indicate JAZ proteins that have a predicted EAR motif.

Reference

**Edgar, R.C.** (2004) MUSCLE: multiple sequence alignment with high accuracy and high throughput. *Nucleic Acids Res.* **32**:1792-1797.

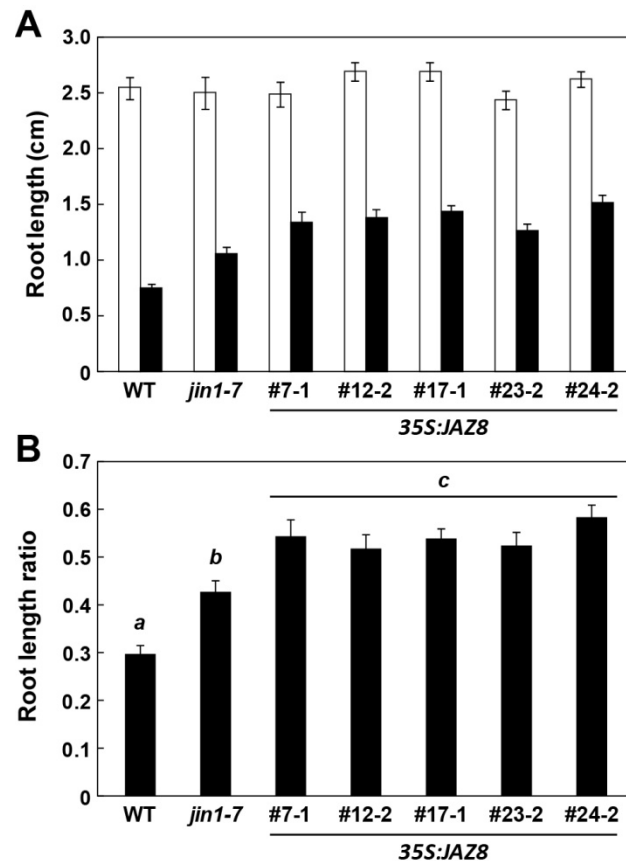

**Supplemental Figure 2. JA-Mediated Root Growth Inhibition in Independent *35S:JAZ8* Lines.**

**(A)** Five independent homozygous *35S:JAZ8* lines, which were selected for high expression of the transgene, were grown together with WT and *jin1-7* seedlings on MS medium supplemented (filled bars) or not supplemented (open bars) with 20  $\mu$ M MeJA. Plants were grown for 8 d on a 16-h light and 8-h dark cycle. Data show the mean  $\pm$  SE for each genotype ( $n > 18$  seedlings per genotype). The mean root length of each *35S:JAZ8* line was significantly longer ( $P < 0.05$ , Student's t-test) than that of the *jin1-7* mutant in the presence of MeJA.

**(B)** Data shown in (A) were plotted as root length ratio, which was calculated by dividing the average the root length of seedlings grown on MeJA-containing medium by the mean root length of seedlings of the same genotype grown in the absence of MeJA. Means with different italicized letters are significantly different at  $P < 0.05$ .

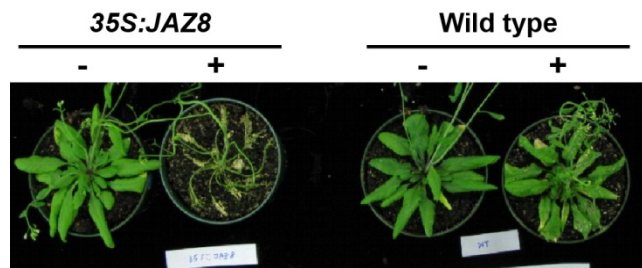

**Supplemental Figure 3. 35S:JAZ8 Plants are Compromised in Resistance to Herbivory by *S. exigua* Larvae.**

Six-week-old 35S:JAZ8 (line #24) and wild-type (WT) plants were challenged (+) for 14 d with *Spodoptera exigua* larva. A separate set of control plants grown side-by-side with the challenged plants were not infested (-) with larvae. The photograph was taken at the end of the feeding trial.

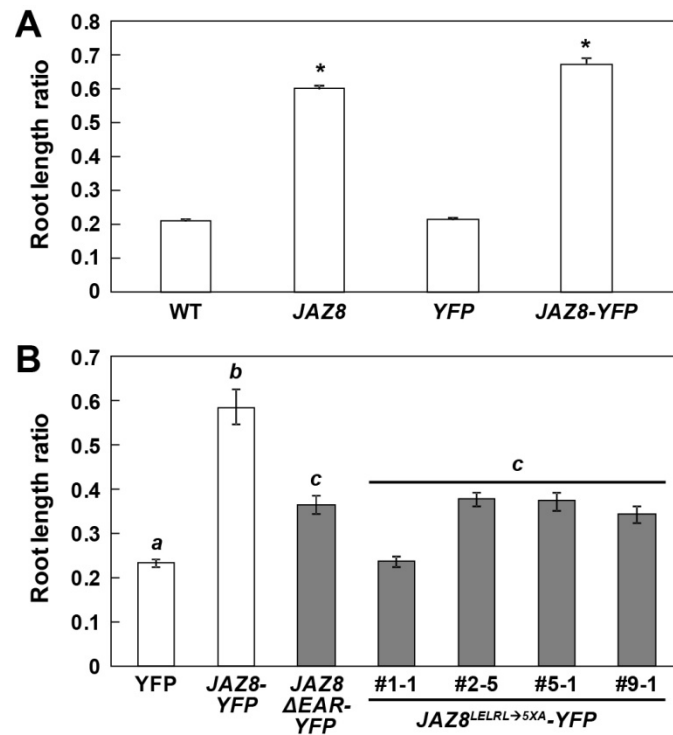

**Supplemental Figure 4. JA-Mediated Root Growth Inhibition in 35S:JAZ8-YFP Lines.**

(A) 35S:JAZ8-YFP plants are insensitive to MeJA. Wild-type (WT), 35S:JAZ8 (line #24; JAZ8), 35S:YFP (YFP), and 35S:JAZ8-YFP (JAZ8-YFP) seedlings were grown on MS medium supplemented with or without 25  $\mu$ M MeJA for 8 d under continuous light. Root length ratios were calculated as described in the legend of Supplemental Figure 2B. Data show the mean  $\pm$  SE for each genotype ( $n > 20$  seedlings per genotype). Asterisks indicate significant differences ( $P < 0.05$ , Student's t-test) in comparisons between the indicated transgenic line and WT.

(B) Mutation of the EAR motif suppresses the JA-insensitive root growth phenotype of 35S:JAZ8-YFP seedlings. Root growth inhibition assays were performed with 35S:YFP (YFP), 35S:JAZ8-YFP (JAZ8-YFP), 35S:JAZ8 $\Delta$ EAR-YFP (JAZ8 $\Delta$ EAR-YFP; gray bars), and four independent 35S:JAZ8<sup>LELRL→5xA</sup>-YFP (JAZ8<sup>LELRL→5xA</sup>-YFP; gray bars) homozygous lines (T3 generation). Seedlings were grown for 8 d on MS medium containing or lacking 20  $\mu$ M MeJA. Data were plotted as root length ratio as described in panel (A). Data show the mean  $\pm$  SE for each genotype ( $n > 23$  seedlings per genotype). Means with different italicized letters are significantly different at  $P < 0.05$ . The root length ratio of 35S:JAZ8<sup>LELRL→5xA</sup>-YFP seedlings was calculated as the mean of all four independent 35S:JAZ8<sup>LELRL→5xA</sup>-YFP lines.

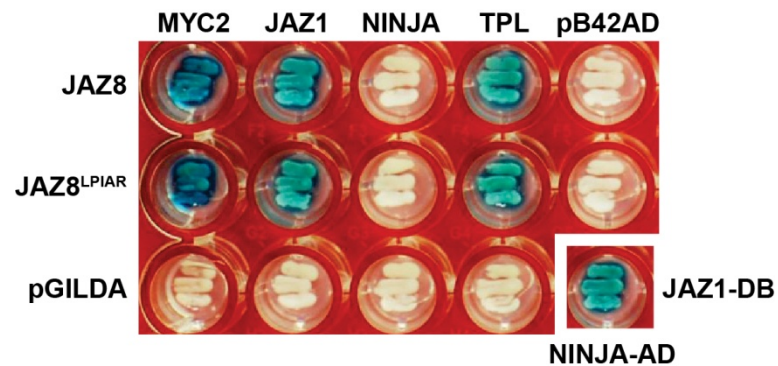

**Supplemental Figure 5. Substitution of PKASM to LPIAR does not Affect the Ability of JAZ8 to Interact with MYC2, JAZ1, or TPL.**

Yeast strains expressing both the bait (JAZ8 or JAZ8<sup>LPIAR</sup>) and prey (MYC2, JAZ1, NINJA or TPL) were plated on SD-Gal medium containing X-gal. Blue color indicates protein-protein interaction. Photographic image was taken 48 h after incubation of yeast cells at 30°C. As a positive control for NINJA interaction, yeast cells were cotransformed with pB42AD-NINJA and pGILDA-JAZ1 (lower right).

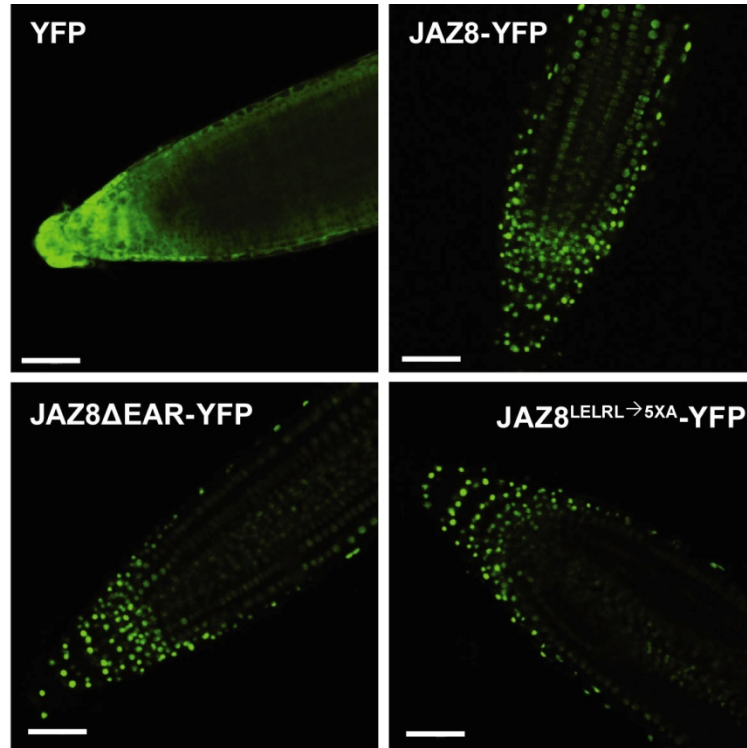

**Supplemental Figure 6. Nuclear Localization of JAZ8-YFP Fusion Proteins.**

Root tips of 9-day-old seedlings expressing the indicated JAZ-YFP reporter were imaged with an Olympus Fluoview confocal microscope. Transgenic lines were *35S:YFP* (YFP), *35S:JAZ8-YFP* (JAZ8-YFP), *35S:JAZ8ΔEAR-YFP* #1-1 (JAZ8ΔEAR-YFP), and *35S:JAZ8<sup>LELRL→5xA</sup>-YFP* #5-1 (JAZ8<sup>LELRL→5xA</sup>-YFP). Scale bar = 50 μm.

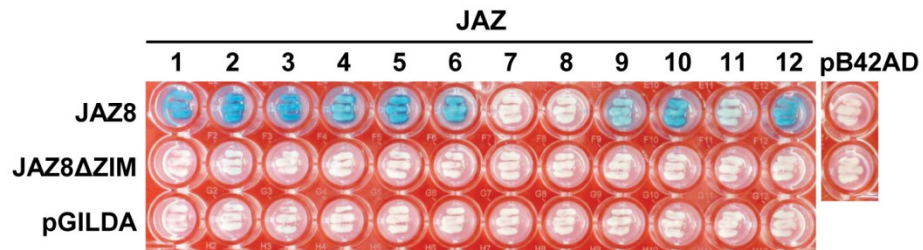

**Supplemental Figure 7. Yeast Two-hybrid Analysis of JAZ8 and JAZ8ΔZIM Interactions with other Arabidopsis JAZ proteins.**

Yeast strains expressing both the bait (JAZ8 or JAZ8ΔZIM) and prey (JAZ1 – JAZ12) were plated on plates containing X-gal. Blue colors indicate protein-protein interaction. Photographic images were taken 48 h after incubation of yeast cells at 30°C.

**Supplemental Table 1. List of oligonucleotide primers used in this study.****Primers in this section used for Y2H and overexpression constructs**

| INSERT          | VECTOR                        | PRIMER NAME                        | SEQUENCE                                 | NOTE                                                            |
|-----------------|-------------------------------|------------------------------------|------------------------------------------|-----------------------------------------------------------------|
| JAZ8            | pGILDA & pB42AD               | JAZ8_NcoI_FP                       | 5'-CCATGGATGAAGCTACAGCAAAAATTGTG-3'      | Yeast two-hybrid vectors                                        |
|                 |                               | JAZ8_XhoI_RP                       | 5'-CTCGAGTTATCGTCGTGAATGGTACG-3'         |                                                                 |
|                 | pBI-TONY                      | JAZ8_Xbal_FP                       | 5'-ATATTTCTAGAATGAAGCTACAGCAAAAATTGTG-3' | Overexpression vector                                           |
|                 |                               | JAZ8_KpnI_RP                       | 5'-ATATGGTACCTTATCGTCGTGAATGGTACG-3'     |                                                                 |
|                 | pBI-EYFP                      | JAZ8_Xbal_FP                       | 5'-ATATTTCTAGAATGAAGCTACAGCAAAAATTGTG-3' | Overexpression vector tagged with EYFP                          |
| JAZ8ns_XhoI_RP  |                               | 5'-CTCGAGTCGTCGTGAATGGTACGGTG-3'   |                                          |                                                                 |
| pENTR-TOPO      | JAZ8_pENTR_FP                 | 5'-CACCATGAAGCTACAGCAAAAATTGTG-3'  | Gateway construct                        |                                                                 |
| JAZ8_pENTR_RP   | 5'-TTATCGTCGTGAATGGTACGGTG-3' |                                    |                                          |                                                                 |
| JAZ8-Jas10      | pGILDA & pB42AD               | JAZ8_Xbal_FP                       | 5'-ATATTTCTAGAATGAAGCTACAGCAAAAATTGTG-3' | Used EcoRI site from pGEM-T Easy for cloning into Y2H vectors   |
|                 |                               | JAZ10_NcoI_RP                      | 5'-CCATGGTATAGGCCGATGTCGGATAGTAAG-3'     |                                                                 |
|                 | pBITONY                       | JAZ8_Xbal_FP                       | 5'-ATATTTCTAGAATGAAGCTACAGCAAAAATTGTG-3' |                                                                 |
|                 |                               | JAZ10_KpnI_RP                      | 5'-GGTACCTTAGGCCGATGTCGGATAGTAAG-3'      |                                                                 |
|                 | pBI-EYFP                      | JAZ8_Xbal_FP                       | 5'-ATATTTCTAGAATGAAGCTACAGCAAAAATTGTG-3' |                                                                 |
| JAZ10ns_KpnI_RP |                               | 5'-GGTACCGCCGATGTCGGATAGTAAGGAG-3' |                                          |                                                                 |
| JAZ10-Jas8      | pGILDA & pB42AD               | JAZ10_NcoI_FP                      | 5'-CCATGGATGTCGAAAGCTACCATAGAAC-3'       |                                                                 |
|                 |                               | JAZ8_XhoI_RP                       | 5'-CTCGAGTTATCGTCGTGAATGGTACG-3'         |                                                                 |
|                 | pBITONY                       | JAZ10_BamHI_FP                     | 5'-GGATCCATGTCGAAAGCTACCATAGAAC-3'       |                                                                 |
|                 |                               | JAZ8_XhoI_RP                       | 5'-CTCGAGTTATCGTCGTGAATGGTACG-3'         |                                                                 |
|                 | pBI-EYFP                      | JAZ10_BamHI_FP                     | 5'-GGATCCATGTCGAAAGCTACCATAGAAC-3'       |                                                                 |
| JAZ8ns_XhoI_RP  |                               | 5'-CTCGAGTCGTCGTGAATGGTACGGTG-3'   |                                          |                                                                 |
| JAZ8ΔZIM        | pGILDA & pB42AD               | JAZ8_NcoI_FP                       | 5'-CCATGGATGAAGCTACAGCAAAAATTGTG-3'      |                                                                 |
|                 |                               | JAZ8_XhoI_RP                       | 5'-CTCGAGTTATCGTCGTGAATGGTACG-3'         |                                                                 |
|                 | pBI-TONY                      | JAZ8_Xbal_FP                       | 5'-ATATTTCTAGAATGAAGCTACAGCAAAAATTGTG-3' |                                                                 |
|                 |                               | JAZ8_KpnI_RP                       | 5'-ATATGGTACCTTATCGTCGTGAATGGTACG-3'     |                                                                 |
|                 | pBI-EYFP                      | JAZ8_Xbal_FP                       | 5'-ATATTTCTAGAATGAAGCTACAGCAAAAATTGTG-3' |                                                                 |
| JAZ8ns_XhoI_RP  |                               | 5'-CTCGAGTCGTCGTGAATGGTACGGTG-3'   |                                          |                                                                 |
| JAZΔEAR         | pENTR-TOPO                    | JAZ8_pENTR_FP                      | 5'-CACCATGAAGCTACAGCAAAAATTGTG-3'        | JAZΔEAR further cloned into pGILDA & pB42AD via Gateway cloning |
|                 |                               | JAZ8_pENTR_RP                      | 5'-TTATCGTCGTGAATGGTACGGTG-3'            |                                                                 |
|                 | pBI-TONY                      | JAZ8_Xbal_FP                       | 5'-ATATTTCTAGAATGAAGCTACAGCAAAAATTGTG-3' |                                                                 |
|                 |                               | JAZ8_XhoI_RP                       | 5'-CTCGAGTTATCGTCGTGAATGGTACG-3'         |                                                                 |
|                 | pBI-EYFP                      | JAZ8_Xbal_FP                       | 5'-ATATTTCTAGAATGAAGCTACAGCAAAAATTGTG-3' |                                                                 |
| JAZ8ns_XhoI_RP  |                               | 5'-CTCGAGTCGTCGTGAATGGTACGGTG-3'   |                                          |                                                                 |
| JAZ8ΔEZ         | pENTR-TOPO                    | JAZ8_pENTR_FP                      | 5'-CACCATGAAGCTACAGCAAAAATTGTG-3'        | JAZ8ΔEZ further cloned into pGILDA & pB42AD via Gateway cloning |
|                 |                               | JAZ8_pENTR_RP                      | 5'-TTATCGTCGTGAATGGTACGGTG-3'            |                                                                 |
|                 | pBI-TONY                      | JAZ8_Xbal_FP                       | 5'-ATATTTCTAGAATGAAGCTACAGCAAAAATTGTG-3' |                                                                 |
|                 |                               | JAZ8_XhoI_RP                       | 5'-CTCGAGTTATCGTCGTGAATGGTACG-3'         |                                                                 |
|                 | pBI-EYFP                      | JAZ8_Xbal_FP                       | 5'-ATATTTCTAGAATGAAGCTACAGCAAAAATTGTG-3' |                                                                 |
| JAZ8ns_XhoI_RP  |                               | 5'-CTCGAGTCGTCGTGAATGGTACGGTG-3'   |                                          |                                                                 |

**Primers in this section used for MBP-JAZ-His constructs**

| INSERT              | VECTOR    | PRIMER NAME    | SEQUENCE                                   | NOTE |
|---------------------|-----------|----------------|--------------------------------------------|------|
| JAZ6                | pRMG-nMAL | AtJAZ6-5'NotI  | 5'-GCGCGGCCCATGTCAACGGACAAGCGC-3'          |      |
|                     |           | AtJAZ6-3'XhoI  | 5'-CGGCTCGAGAAGCTTGAAGTTTCAAGTTTTGG-3'     |      |
| JAZ7                | pRMG-nMAL | NotI-C-JAZ7-FP | 5'-GCGCGGCCCATCATCATCAAAAAGCTGCGACAAGCC-3' |      |
|                     |           | JAZ7_NotI_FP   | 5'-GCGCGGCCCATGATCATCATC-3'                |      |
|                     |           | JAZ7_XhoI_RP   | 5'-CTCGAGCTATCGGTAACGGTGGTAAG-3'           |      |
| JAZ8                | pRMG-nMAL | JAZ8_NotI_FP   | 5'-GCGCGCCGATGAAGCTACAGC-3'                |      |
|                     |           | JAZ8 XhoI RP   | 5'-CTCGAGTTATCGTCGTGAATGGTACG              |      |
| JAZ12               | pRMG-nMAL | AtJAZ12-NotI F | 5'-GCGCGGCCGCACTAAGGTGAAAGATGAG-3'         |      |
|                     |           | AtJAZ12-Sall R | 5'-TCGGTGCACAGCAGTTGAAAATCCTCC-3'          |      |
| JAZ8-Jas10          | pRMG-nMAL | JAZ8_NotI_FP   | 5'-GCGCGCCGATGAAGCTACAGC-3'                |      |
|                     |           | AtJAZ10-Sall   | 5'-TCGGTGCACGCGCATGTCGGATAG-3'             |      |
| JAZ10-Jas8          | pRMG-nMAL | AtJAZ10-NotI   | 5'-GCGCGGCCGCTGAAAGCTACCATAGAAGCTCG-3'     |      |
|                     |           | JAZ8 XhoI RP   | 5'-CTCGAGTTATCGTCGTGAATGGTACG              |      |
| JAZ8 <sup>PAR</sup> | pRMG-nMAL | JAZ8_NotI_FP   | 5'-GCGCGCCGATGAAGCTACAGC-3'                |      |
|                     |           | JAZ8 XhoI RP   | 5'-CTCGAGTTATCGTCGTGAATGGTACG              |      |



## Primers in this section used for chimeric proteins and deletion constructs

| CONSTRUCT  | TEMPLATE                                  | PRIMER NAME                         | SEQUENCE                                                                               | NOTE                                                                               |
|------------|-------------------------------------------|-------------------------------------|----------------------------------------------------------------------------------------|------------------------------------------------------------------------------------|
| JAZ8-Jas10 | JAZ8                                      | JAZ8_Xbal_FP<br>JAZ8_Jas10_RP       | 5'-ATATTCTAGAATGAAGCTACAGCAAAATTTGTG-3'<br>5'-GCGATGGGAAGATCTGGAAGCTGATTATGATGAAATG-3' | 1st PCR reaction to amplify a portion of JAZ8 (1-100 aa)                           |
|            | JAZ10.1                                   | JAZ8_Jas10_FP<br>JAZ10_KpnI_RP      | 5'-CATAATCAGCTTCCAGATCTTCCATCGCAAGGAG-3'<br>5'-GGTACCTTAGGCCGATGTCGGATAGTAAG-3'        | 2nd PCR reaction to amplify a portion of JAZ10.1 (166-205 aa)                      |
|            | JAZ8 (1-100 aa) &<br>JAZ10.1 (166-205 aa) | JAZ8_Xbal_FP<br>JAZ10_KpnI_RP       | 5'-ATATTCTAGAATGAAGCTACAGCAAAATTTGTG-3'<br>5'-GGTACCTTAGGCCGATGTCGGATAGTAAG-3'         | 3rd PCR reaction to amplify JAZ8-Jas10                                             |
|            | JAZ10.1                                   | JAZ10_BamHI_FP<br>JAZ10_Jas8_RP     | 5'-GGATCCATGTCGAAAGCTACCATAGAAC-3'<br>5'-GATGCTTTTGGATTTCTCTAGATTCTGCCAAAAG-3'         | 1st PCR reaction to amplify a portion of JAZ10.1 (1-165 aa)                        |
| JAZ10-Jas8 | JAZ8                                      | JAZ10_Jas8_FP<br>JAZ8_XhoI_RP       | 5'-GAATCTAGAAGAAATCCAAAAGCATCAATGAAAATC-3'<br>5'-CTCGAGTTATCGTCGTGAATGGTACG-3'         | 2nd PCR reaction to amplify a portion of JAZ8 (101-131 aa)                         |
|            | JAZ10.1 (1-165 aa) &<br>JAZ8 (72-131 aa)  | JAZ10_BamHI_FP<br>JAZ8_XhoI_RP      | 5'-GGATCCATGTCGAAAGCTACCATAGAAC-3'<br>5'-CTCGAGTTATCGTCGTGAATGGTACG-3'                 | 3rd PCR reaction to amplify JAZ10-Jas8                                             |
|            | JAZ8                                      | JAZ8_NcoI_FP<br>JAZ8_deltaZIM_RP    | 5'-CCATGGATGAAGCTACAGCAAAATTTGTG-3'<br>5'-GTTTTCTCATTCTCTGCTTTGAGATCTTCAATTTGG-3'      | 1st PCR reaction to amplify a portion of JAZ8 (1-44 aa)                            |
|            | JAZ8                                      | JAZ8_deltaZIM_FP<br>JAZ8_XhoI_RP    | 5'-CCAAATGAAGATCTCAAGCAGAGAAATGAAAC-3'<br>5'-CTCGAGTTATCGTCGTGAATGGTACG-3'             | 2nd PCR reaction to amplify a portion of JAZ8 (72-131 aa)                          |
| JAZ8ΔZIM   | JAZ8 (1-44 aa) &<br>JAZ8 (72-131 aa)      | JAZ8_NcoI_FP<br>JAZ8_XhoI_RP        | 5'-CCATGGATGAAGCTACAGCAAAATTTGTG-3'<br>5'-CTCGAGTTATCGTCGTGAATGGTACG-3'                | 3rd PCR reaction to amplify JAZ8ΔZIM                                               |
|            | JAZ8                                      | JAZ8_deltaEAR_FP<br>JAZ8_pENTR_RP   | 5'-GCTACAGCAAAATTTGTGAC TTTCCACTTCTTATGATTC-3'<br>5'-TTATCGTCGTGAATGGTACGGTG-3'        | 1st PCR reaction to amplify a portion of JAZ8 lacking the EAR motif                |
|            | JAZ8 (6-396 bp)                           | JAZ8_pENTR_FP<br>JAZ8_pENTR_RP      | 5'-CACCATGAAGCTACAGCAAAATTTGTG-3'<br>5'-TTATCGTCGTGAATGGTACGGTG-3'                     | 2nd PCR reaction to amplify JAZ8ΔEAR                                               |
|            | JAZ8                                      | JAZ8_deltaEAR_FP<br>JAZ8_pENTR_RP   | 5'-GCTACAGCAAAATTTGTGAC TTTCCACTTCTTATGATTC-3'<br>5'-TTATCGTCGTGAATGGTACGGTG-3'        | 1st PCR reaction to amplify a portion of JAZ8 lacking the EAR motif and ZIM domain |
| JAZ8ΔEZ    | JAZ8ΔZIM (6-315 bp)                       | JAZ8_pENTR_FP<br>JAZ8_pENTR_RP      | 5'-CACCATGAAGCTACAGCAAAATTTGTG-3'<br>5'-TTATCGTCGTGAATGGTACGGTG-3'                     | 2nd PCR reaction to amplify JAZ8ΔEZ                                                |
|            | JAZ8                                      | JAZ8_NcoI_FP<br>JAZ8_XhoI_306R      | 5'-CCATGGATGAAGCTACAGCAAAATTTGTG-3'<br>5'-CTCGAGTTATGGATTTGGAAGCTGATTATG-3'            |                                                                                    |
| JAZ8ΔJas   | JAZ8                                      | JAZ8_ATG133_NcoI_FP<br>JAZ8_XhoI_RP | 5'-CCATGGATGCAATACAGCTTCCAAATCC-3'<br>5'-CTCGAGTTATCGTCGTGAATGGTACG-3'                 |                                                                                    |

## Primers in this section used for site-directed mutagenesis

| CONSTRUCT                  | TEMPLATE                   | PRIMER NAME                        | SEQUENCE                                                                                                     | NOTE                                                                                                 |
|----------------------------|----------------------------|------------------------------------|--------------------------------------------------------------------------------------------------------------|------------------------------------------------------------------------------------------------------|
| JAZ8 <sup>PIAR-AAAAA</sup> | JAZ8                       | JAZ8_AR_FP<br>JAZ8_AR_RP           | 5'-CCAAATCCAAAAGCAGCAAGGAAAAATCTCTCC-3'<br>5'-GGAGAGATTTTTCTTGTGCTTTTGGATTTGG-3'                             | Forward primer to create SM ->AR mutation<br>Reverse primer to create SM ->AR mutation               |
|                            | JAZ8 <sup>AR-AAA</sup>     | JAZ8_IAR_FP<br>JAZ8_IAR_RP         | 5'-CCAAATCCAAAATCCAAAATCGCAAGGAAAAATCTCTCC-3'<br>5'-GAGAGATTTTTCTTGTGCTTTTGGATTTGGATTTGG-3'                  | Forward primer to create ASM ->IAR mutation<br>Reverse primer to create ASM ->IAR mutation           |
|                            | JAZ8 <sup>PIAR-AAA</sup>   | JAZ8_PIAR_FP<br>JAZ8_PIAR_RP       | 5'-CTTCCAAATCCAAATCCAAATCCGCAAGGAAAAATC-3'<br>5'-GATTTTTCTTGTGCTTTTGGATTTGGATTTGGAAAG-3'                     | Forward primer to create KASM ->PIAR mutation<br>Reverse primer to create KASM ->PIAR mutation       |
|                            | JAZ8 <sup>PIAR-AAAAA</sup> | JAZ8_LPIAR_FP<br>JAZ8_LPIAR_RP     | 5'-CATAATCAGCTTCCA AATCTTCCATGCGCAAGGAAAAATC-3'<br>5'-GATTTTTCTTGTGCTTTTGGATTTGGATTTGGAAAG-3'                | Forward primer to create PKASM ->LPIAR mutation<br>Reverse primer to create PKASM ->LPIAR mutation   |
|                            | JAZ8                       | JAZ8_LEtoAA_FP<br>JAZ8_LEtoAA_RP   | 5'-GCTACAGCAAAATTTGTGACGCGGCACCTCGTCTTTTCCCAC-3'<br>5'-GTGGGAAAAAGACGAAAGTCCGCGTCAACAATTTGCTGTAGC-3'         | Forward primer to create LE -> AA mutation<br>Reverse primer to create LE -> AA mutation             |
|                            | JAZ8 <sup>LE-AAA</sup>     | LELRLtoAAAAA_FP<br>LELRLtoAAAAA_RP | 5'-GCAAAATTTGTGACGCGGCAGCTGCTGTTTTCCACTTCTTATGATTC-3'<br>5'-GAATCATAGAAGTGGGAAAGCAGCAGCTGCCGCTCACAATTTTGC-3' | Forward primer to create LELRL -> AAAAA mutation<br>Reverse primer to create LELRL -> AAAAA mutation |

## Primers in this section used for constructs in the carrot protoplast assay

| CONSTRUCT    | TEMPLATE | PRIMER NAME                | SEQUENCE                                                                                                                             | NOTE                                                                                                                                 |
|--------------|----------|----------------------------|--------------------------------------------------------------------------------------------------------------------------------------|--------------------------------------------------------------------------------------------------------------------------------------|
| 35S::GD-JAZ8 |          | JAZ8-F<br>JAZ8-R           | 5'-GGGGACAAGTTTGTACAAAAAAGCAGGCTCAATGAAGCTACAGCAAAATTTGACTTGG-3'<br>5'-GGGGACCACCTTTGTACAAAGAGCTGGTCTCATCGTCGTGAATGGTACGGTGAAGTAG-3' | Effector primers used in carrot protoplasts assay<br>Effector primers used in carrot protoplasts assay                               |
|              |          | JAZ8N-F<br>JAZ8N-R         | 5'-GGGGACAAGTTTGTACAAAAAAGCAGGCTCAATGAAGCTACAGCAAAATTTGACTTGG-3'<br>5'-GGGGACCACCTTTGTACAAAGAGCTGGTCTCATCGTCGTGAATGGTACGGTGAAGTAG-3' | Effector primers used in carrot protoplasts assay<br>Effector primers used in carrot protoplasts assay                               |
| JAZ8-L9A     | JAZ8     | JAZ8-L9A-F<br>JAZ8-L9A-R   | 5'-AAGCTACAGCAAAATTTGTGACGCGGAACCTCGTCTTTTCCCAC-3'<br>5'-GTGGGAAAAAGCAGCAAGTCCGCGTCAACAATTTGCTGTAGCT-3'                              | Site-directed mutagenesis primer used in carrot protoplast assay<br>Site-directed mutagenesis primer used in carrot protoplast assay |
|              |          | JAZ8-E10A                  | JAZ8-E10-F<br>JAZ8-E10-R                                                                                                             | 5'-CAGCAAAATTTGTGACTTGGCACTTCTGCTTTTCCCAC-3'<br>5'-AGTGGGAAAAAGCAGCAAGTCCGCGTCAACAATTTGCTGTAGCT-3'                                   |
| JAZ8-L11A    | JAZ8     | JAZ8-L11A-F<br>JAZ8-L11A-R | 5'-GCTACAGCAAAATTTGTGACTTGAAGCTGCTCTTTTCCCAC-3'<br>5'-AGTGGGAAAAAGCAGCAAGTCCGCGTCAACAATTTGCTGTAGCT-3'                                | Site-directed mutagenesis primer used in carrot protoplast assay<br>Site-directed mutagenesis primer used in carrot protoplast assay |
|              |          | JAZ8-R12A                  | JAZ8-R12A-F<br>JAZ8-R12A-R                                                                                                           | 5'-CTACAGCAAAATTTGTGACTTGAAGCTTGTCTTTTCCCAC-3'<br>5'-GAAGTGGGAAAAAGCAGCAAGTCCGCGTCAACAATTTGCTGTAGCT-3'                               |
| JAZ8-L13A    | JAZ8     | JAZ8-L13A-F<br>JAZ8-L13A-R | 5'-CAAAATTTGTGACTTGAAGCTTGTGCTTTTCCCAC-3'<br>5'-TCAGAATCATAGAAGTGGGAAAGCAGCAAGTCCGCGTCAACAATTTTGG-3'                                 | Site-directed mutagenesis primer used in carrot protoplast assay<br>Site-directed mutagenesis primer used in carrot protoplast assay |
|              |          | JAZ8-F14A                  | JAZ8-F14A-F<br>JAZ8-F14A-R                                                                                                           | 5'-ACAGCAAAATTTGTGACTTGAAGCTTGTGCTTTTCCCAC-3'<br>5'-AATCATAGAAGTGGGAAAGCAGCAAGTCCGCGTCAACAATTTTGG-3'                                 |

## Primers in this section used for other Y2H constructs

| INSERT | VECTOR          | PRIMER NAME           | SEQUENCE                              | NOTE                                                          |
|--------|-----------------|-----------------------|---------------------------------------|---------------------------------------------------------------|
| NINJA  | pENTR-TOPO      | NINJA_pEntr_EcoRI_FP  | 5'-CACCGAATTCATGGACGATGATAATGGGCTC-3' | NINJA further cloned into pGILDA & pB42AD via Gateway cloning |
|        |                 | NINJA_BglII_pB42AD_RP | 5'-AGATCTTCAGGTGTGAGCTGACGCTGC-3'     |                                                               |
| TPL    | pENTR-TOPO      | TPL_pENTR_FP          | 5'-CACCATGTCTTCTCTTAGTAGAGAGCTCG-3'   | TPL further cloned into pGILDA & pB42AD via Gateway cloning   |
|        |                 | TPL_pENTR_RP          | 5'-CCC GGG TCATCTCTGAGGCTGATCAG-3'    |                                                               |
| MYC2   | pGILDA & pB42AD |                       |                                       | Described in Chung et al (2009)                               |
| JAZ3   | pGILDA & pB42AD |                       |                                       | Described in Chung et al (2009)                               |
| JAZ1   | pGILDA & pB42AD |                       |                                       | Described in Melotto et al (2008)                             |

**Supplemental Table 2.**  
**JAZ genes used for construction of consensus motifs shown in Figure 6.**

**JAZ8-like sequences used for consensus Jas motif shown in Figure 6A**

| SPECIES                     | GENE ID               | Jas MOTIF                  |
|-----------------------------|-----------------------|----------------------------|
| <i>Arabidopsis lyrata</i>   | 881314                | NPKASMKKSLSQSFQKRSRIQATSPY |
| <i>Arabidopsis lyrata</i>   | 333262                | NQKVSMKRSLRSFQKRNVRQATSPY  |
| <i>Arabidopsis lyrata</i>   | 482423                | NQKVSMKRSLRSFQKRNVRQATSPY  |
| <i>Glycine max</i>          | Glyma05g27280.1       | STGLSMKRSLQRFQKRNVRQETSPY  |
| <i>Glycine max</i>          | Glyma08g27280.1       | GTGLSMKRSLQRFQKRNVRQETSPY  |
| <i>Glycine max</i>          | Glyma13g29070.1       | GTGLSMKRSLQRFQKRNVRQEASPY  |
| <i>Glycine max</i>          | Glyma15g09980.1       | GTGSPMRKSLQRFQKRNVRQEASPY  |
| <i>Carica papaya</i>        | supercontig_17.12     | ANGLSMKRSLQRFQKRKHSIRATSPY |
| <i>Ricinus communis</i>     | 29693.m001988         | STGLSMKRSLQRFQKRNVRQATSPY  |
| <i>Ricinus communis</i>     | 29693.m001989         | NNGLSMKRSLQRFQKRNVRQATCPY  |
| <i>Cucumis sativus</i>      | Cucsa.047800.1        | TPGLSMKKSLSQSFQKRNVRQATSPY |
| <i>Cucumis sativus</i>      | Cucsa.054580.1        | EASPSMRRSLQRFQKRNVRQATSPY  |
| <i>Cucumis sativus</i>      | Cucsa.054630.1        | GSGLSMKRSLQRFQKRNVRQASPY   |
| <i>Cucumis sativus</i>      | Cucsa.179960.1        | AGFSIKKSLQKFLQRRKRRIRTMSPY |
| <i>Medicago truncatula</i>  | Medtr2g024430.1       | GPGLSMKRSLQRFQKRNVRQETSPY  |
| <i>Medicago truncatula</i>  | Medtr4g154880.1       | QSGLSMKRSLQRFQKRNVRQETSPY  |
| <i>Prunus persica</i>       | ppa013410m            | VAGMSMKRSLQRFQKRNVRQATSPY  |
| <i>Prunus persica</i>       | ppa018461m            | PPGVSMKRSLQSFQKRNVRQETSPY  |
| <i>Mimulus guttatus</i>     | mgv1a016361m          | TSGLSMKRSLQRFQKRNVRQATSPY  |
| <i>Mimulus guttatus</i>     | mgv1a016202m          | SSVSMKRSLKMFQKRNVRQATSPY   |
| <i>Vitis Vinifera</i>       | GSVIVT01021514001     | ATGLSMKRSLQRFQKRNVRQATSPY  |
| <i>Vitis Vinifera</i>       | GSVIVT01021516001     | PTGLSMKRSLQRFQKRNVRQATSPY  |
| <i>Vitis Vinifera</i>       | GSVIVT01021519001     | PTGLSMKRSLRSFQKRNVRQATSPY  |
| <i>Manihot esculenta</i>    | cassava4.1_026855m    | VYSPNMKISLQRFQKRNVRQATSPY  |
| <i>Manihot esculenta</i>    | cassava4.1_019045m    | AAGLSMKRSLQRFQKRNVRQENSPY  |
| <i>Manihot esculenta</i>    | cassava4.1_018315m    | NTALSMKRSLQRFQKRNVRQATSPY  |
| <i>Citrus sinensis</i>      | orange1.1g046141m     | NSGLSMKRSLQRFQKRNVRQATSPY  |
| <i>Populus trichocarpa</i>  | POPTR_0006s02410.1    | PPGLSLKRSLQRFQKRNVRQATSPY  |
| <i>Eucalyptus grandis</i>   | Egrandis_v1_0.031045m | STGLSMKRSLQRFQKRNVRQATSPY  |
| <i>Eucalyptus grandis</i>   | Egrandis_v1_0.049073m | GTGLSMKRSLQRFQKRNVRQATSPY  |
| <i>Citrus clementina</i>    | clementine0.9_025662m | NSGLSMKRSLQRFQKRNVRQATSPY  |
| <i>Arabidopsis thaliana</i> | AT2G34600.1           | YQKASMKRSLHSFQKRNVRQATSPY  |
| <i>Arabidopsis thaliana</i> | AT1G30135.1           | NPKASMKKSLSQSFQKRNVRQATSPY |

**JAZ10-like sequences used for consensus Jas motif shown in Figure 6B**

| SPECIES                           | GENE ID            | JAS MOTIF                    |
|-----------------------------------|--------------------|------------------------------|
| <i>Sorghum bicolor</i>            | Sb01g045180        | DMPLARKVSLKRFLEKRKNRLTAADPY  |
| <i>Sorghum bicolor</i>            | Sb02g025720        | DLPIARRNSLHRFLEKRKDRITAKAPY  |
| <i>Sorghum bicolor</i>            | Sb06g031060        | DLPIARRHSLQRFLKRRDRIVSKAPY   |
| <i>Selaginella moellendorffii</i> | 439249             | DLPQARKASLHRFLEKRKDRLFAKSDK  |
| <i>Arabidopsis lyrata</i>         | 488996             | DLPIARRHSLQRFLKRRDRLVNKNPY   |
| <i>Arabidopsis lyrata</i>         | 936941             | DVPIARRRSLQRFLKRRDRFVHTNPY   |
| <i>Arabidopsis lyrata</i>         | 476379             | VERIARRASLHRFFAKRKDRAVARAPY  |
| <i>Arabidopsis lyrata</i>         | 472142             | ELPIARRASLHRFLEKRKDRVTSKAPY  |
| <i>Arabidopsis lyrata</i>         | 476633             | ELPIARRASLHRFLEKRKDRITSKAPY  |
| <i>Arabidopsis lyrata</i>         | 488138             | DLPIARRKSLQRFLKRRKERLVSTSPY  |
| <i>Glycine max</i>                | Glyma09g09100.1    | EFPIARRHSLQRFLKRRDRLGSKAPY   |
| <i>Glycine max</i>                | Glyma09g09100.2    | EFPIARRHSLQRFLKRRDRLGSKAPY   |
| <i>Glycine max</i>                | Glyma13g17180.1    | DLPIARKASLHRFSLKRRDRIAAKAPY  |
| <i>Glycine max</i>                | Glyma13g17640.2    | EFPLARRQSLQRFLKRRNRNLANKSPH  |
| <i>Glycine max</i>                | Glyma15g19840.4    | HLPIARKASLHRFLEKRKDRIASKAPY  |
| <i>Glycine max</i>                | Glyma15g20670.1    | EFPIARRHSLQRFLKRRDRLGSKTPY   |
| <i>Glycine max</i>                | Glyma17g05540.1    | ELPIARKVSLHRFSLKRRKDRIASKAPY |
| <i>Carica papaya</i>              | supercontig_113.51 | NLPIARKISLQHFIEKRRKSRVMSQSPY |
| <i>Brachypodium distachyon</i>    | Bradi1g72600.1     | EMPMARKASLQRFLKRRKSRLLAAADPY |
| <i>Brachypodium distachyon</i>    | Bradi3g10820.1     | DLPIARKASLHRFLEKRKDRLHAKAPY  |
| <i>Brachypodium distachyon</i>    | Bradi4g31240.1     | DLPIARRNSLHRFLEKRKGRVIKAPY   |
| <i>Brachypodium distachyon</i>    | Bradi5g08650.1     | DIPLARTKSLQQFLVKRERLTHLGPY   |
| <i>Brachypodium distachyon</i>    | Bradi5g24410.2     | DLPIARRHSLQRFLKRRDRIVSKAPY   |
| <i>Ricinus communis</i>           | 29727.m000494      | DLPIARRASLHRFFEKRRDRAAAKAPY  |
| <i>Ricinus communis</i>           | 29765.m000754      | DLPIARKLSLQHFLEKRRRRRTGKSPY  |
| <i>Ricinus communis</i>           | 30128.m009047      | DLPIARRKSLQRFLKRRKERLTSASPY  |
| <i>Oryza sativa</i>               | Os03g08320         | DMPIARKVSLQRFLKRRKNRIVVAEPL  |
| <i>Oryza sativa</i>               | Os04g32480         | KEPLTRTKSLQRFLSKRKERLTLGPHY  |
| <i>Oryza sativa</i>               | Os09g26780         | DLPIARRNSLHRFLEKRKGRMNANAPY  |
| <i>Cucumis sativus</i>            | Cucsa.141940       | ALPMARKASIQRFLEKRKDRLTPRTPY  |
| <i>Cucumis sativus</i>            | Cucsa.149450       | DLPIARRASLHRFFEKRRDRVAARGPY  |
| <i>Cucumis sativus</i>            | Cucsa.349280       | DLPIARKKSLQRFLKRRKERLTTASPY  |
| <i>Medicago truncatula</i>        | Medtr5g013690      | DLPMTRKASLHRFLEKRKDRIAAKAPY  |
| <i>Prunus persica</i>             | ppa011370m         | DLPIARRASLHKFLAKRKRERVAIAPY  |
| <i>Prunus persica</i>             | ppa011303m         | EFPIARRHSLQRFLKRRDRLVSKNPY   |
| <i>Prunus persica</i>             | ppa011173m         | DLPIARRKSLQRFLKRRKERLNSVSPF  |
| <i>Mimulus guttatus</i>           | mgv1a012664m       | YLPIARKKSLARFLEKRKDRITANAPY  |
| <i>Mimulus guttatus</i>           | mgv1a015572m       | DLPITRRISLQRFLKRRERLIMLSPY   |
| <i>Mimulus guttatus</i>           | mgv1a015559m       | DLPITRRISLQRFLKRRERLIMLSPY   |
| <i>Vitis Vinifera</i>             | GSVIVT01000967001  | DLPLARRKSLHRFLEKRKERLTSVYPY  |
| <i>Vitis Vinifera</i>             | GSVIVT01015042001  | ELPIARKASLHRFLEKRKDRITARAPY  |
| <i>Vitis Vinifera</i>             | GSVIVT01023256001  | DFPIARKSSLQRFLKRRDRITSRSPY   |
| <i>Manihot esculenta</i>          | cassava4.1_013723m | DLPIARRASLHRFLEKRKDRITARAPY  |
| <i>Manihot esculenta</i>          | cassava4.1_031135m | GLPIVTRVSLHRFFEKRRKERVASKAPY |
| <i>Manihot esculenta</i>          | cassava4.1_016821m | DLPIARRKSLQRFLKRRKERLTSLSPY  |
| <i>Manihot esculenta</i>          | cassava4.1_016877m | DLPIARRKSLQRFLKRRKERLTSLSPY  |
| <i>Manihot esculenta</i>          | cassava4.1_015933m | ELPIARRHSLQRFFEKRRDRLYSKSPY  |
| <i>Manihot esculenta</i>          | cassava4.1_014096m | DLPIARRASLHRFLEKRKDRVASKAPY  |
| <i>Manihot esculenta</i>          | cassava4.1_017020m | DLPIARRKSLQRFLKRRKERLTLAFPH  |

**JAZ10-like sequences used for consensus Jas motif shown in Figure 6B, continued**

| SPECIES                     | GENE ID                 | JAS MOTIF                    |
|-----------------------------|-------------------------|------------------------------|
| <i>Citrus sinensis</i>      | orange1.1g027340m       | ELPMARRHSLQRFFEKRRDRLVSKNPY  |
| <i>Citrus sinensis</i>      | orange1.1g027356m       | ELPMARRHSLQRFFEKRRDRLVSKNPY  |
| <i>Citrus sinensis</i>      | orange1.1g028845m       | ELPMARRHSLQRFFEKRRDRLVSKNPY  |
| <i>Citrus sinensis</i>      | orange1.1g030011m       | ELPMARRHSLQRFFEKRRDRLVSKNPY  |
| <i>Citrus sinensis</i>      | orange1.1g028982m       | TVPIARRASLHRFFEKRRDRAIARAPY  |
| <i>Aquilegia coerulea</i>   | AcoGoldSmith_v1.011636m | DLPFARKKSLQRFFLEKRKERLISVTPY |
| <i>Populus trichocarpa</i>  | POPTR_0006s23390.1      | ELPIARRHSLQRFFEKRRDRLVSKSPY  |
| <i>Populus trichocarpa</i>  | POPTR_0018s08300.1      | ELPIARRQSLQRFFKRRDRLVSKSPY   |
| <i>Populus trichocarpa</i>  | POPTR_0003s16350.1      | DLPIARRKSLQRFFLEKRKERLTSATPY |
| <i>Populus trichocarpa</i>  | POPTR_0003s06670.1      | DVPHARRASLHRFFSKRKDRVTARAPY  |
| <i>Populus trichocarpa</i>  | POPTR_0012s04220.1      | AVPQARKASLARFFLEKRKERVTQTSKY |
| <i>Populus trichocarpa</i>  | POPTR_0012s04220.2      | AVPQARKASLARFFLEKRKERVTQTSKY |
| <i>Populus trichocarpa</i>  | POPTR_0012s04220.3      | AVPQARKASLARFFLEKRKERVTQTSKY |
| <i>Populus trichocarpa</i>  | POPTR_0001s13240.1      | DLPIARRKSLQRFFLEKRKGRLTSVSPY |
| <i>Eucalyptus grandis</i>   | Eucgr.F02865.1          | TLPQARRATLVRFFLEKRKDRLSSDIYN |
| <i>Eucalyptus grandis</i>   | Eucgr.F02865.2          | TLPQARRATLVRFFLEKRKDRLSSDIYN |
| <i>Eucalyptus grandis</i>   | Eucgr.G01954.1          | DLPLTRRKSLEFFEKRRKERLTFASPY  |
| <i>Eucalyptus grandis</i>   | Eucgr.B03545.1          | YLPIARRKSLQRFFLEKRKERLTSASPY |
| <i>Eucalyptus grandis</i>   | Eucgr.C00753.1          | DLPIARRHSLQRFFEKRRDRLVSKAPY  |
| <i>Eucalyptus grandis</i>   | Eucgr.C00753.2          | DLPIARRHSLQRFFEKRRDRLVSKAPY  |
| <i>Eucalyptus grandis</i>   | Eucgr.H00537.1          | ALPQARQASLARFFLEKRKERAMTTSPY |
| <i>Eucalyptus grandis</i>   | Eucgr.H00537.2          | ALPQARQASLARFFLEKRKERAMTTSPY |
| <i>Citrus clementina</i>    | clementine0.9_021045m   | ELPMARRHSLQRFFEKRRDRLVSKNPY  |
| <i>Citrus clementina</i>    | clementine0.9_021054m   | ELPMARRHSLQRFFEKRRDRLVSKNPY  |
| <i>Citrus clementina</i>    | clementine0.9_022268m   | TVPIARRASLHRFFEKRRDRAIARAPY  |
| <i>Citrus clementina</i>    | clementine0.9_023056m   | DLPIARRKSLQRFFLEKRKERNDMESDI |
| <i>Zea mays</i>             | GRMZM2G116614_T01       | DLPIARRNSLHRFFLEKRKDRITAKAPY |
| <i>Zea mays</i>             | GRMZM2G145407_T01       | DMPLTRTKSLQQFLQKRKERLSGPGPY  |
| <i>Zea mays</i>             | GRMZM2G086920_T02       | DLPIARRHSLQRFFLEKRDRVVSAPY   |
| <i>Zea mays</i>             | GRMZM2G005954_T01       | DLPIARRNSLHRFFLEKRKDRITAKAPY |
| <i>Zea mays</i>             | GRMZM2G005954_T02       | DLPIARRNSLHRFFLEKRKDRITAKAPY |
| <i>Zea mays</i>             | GRMZM2G024680_T01       | MPPIARKLTLQNFLEKRKRNIAGTDDA  |
| <i>Zea mays</i>             | GRMZM2G143402_T03       | DLPIARRHSLQRFFLEKRDRVVSAPY   |
| <i>Zea mays</i>             | GRMZM2G143402_T01       | DLPIARRHSLQRFFLEKRDRVVSAPY   |
| <i>Zea mays</i>             | GRMZM2G143402_T02       | DLPIARRHSLQRFFLEKRDRVVSAPY   |
| <i>Arabidopsis thaliana</i> | AT1G72450.1             | VERIARRASLHRFFAKRKDRVARAPY   |
| <i>Arabidopsis thaliana</i> | AT1G70700.2             | SVPQARKASLARFFLEKRKERLMSAMPY |
| <i>Arabidopsis thaliana</i> | AT1G74950.1             | ELPIARRASLHRFFLEKRKDRITSKAPY |
| <i>Arabidopsis thaliana</i> | AT1G19180.1             | ELPIARRASLHRFFLEKRKDRVTSKAPY |
| <i>Arabidopsis thaliana</i> | AT1G19180.2             | ELPIARRASLHRFFLEKRKDRVTSKAPY |
| <i>Arabidopsis thaliana</i> | AT3G43440.1             | DVPIARRRSLQRFFEKRRHRFVHTKPY  |
| <i>Arabidopsis thaliana</i> | AT3G43440.2             | DVPIARRRSLQRFFEKRRHRFVHTKPY  |
| <i>Arabidopsis thaliana</i> | AT5G20900.1             | DLPIARRHSLQRFFLEKRDRVSKNPY   |
| <i>Setaria italica</i>      | Si037628m               | DLPIARKASLQRFLQKRKRHINAEPY   |
| <i>Setaria italica</i>      | Si023275m               | DLPIARRHSLQRFFLEKRDRIVNKAPY  |

**JAZ8-like sequences used for consensus EAR motif shown in Figure 6C**

| SPECIES                     | GENE ID                     | EAR MOTIF |
|-----------------------------|-----------------------------|-----------|
| <i>Arabidopsis lyrata</i>   | 881314                      | LELRL     |
| <i>Arabidopsis lyrata</i>   | 333262                      | LELRL     |
| <i>Glycine max</i>          | Glyma05g27280.1             | LELRL     |
| <i>Glycine max</i>          | Glyma08g27280.1             | LELRL     |
| <i>Glycine max</i>          | Glyma13g29070.1             | LELAL     |
| <i>Glycine max</i>          | Glyma15g09980.1             | LELAL     |
| <i>Carica papaya</i>        | evm.model.supercontig_17.12 | LELRL     |
| <i>Ricinus communis</i>     | 29693.m001989               | LELRL     |
| <i>Cucumis sativus</i>      | Cucsa.047800.1              | LELRL     |
| <i>Cucumis sativus</i>      | Cucsa.054580.1              | LELCL     |
| <i>Cucumis sativus</i>      | Cucsa.054630.1              | LELRL     |
| <i>Cucumis sativus</i>      | Cucsa.179960.1              | LELGL     |
| <i>Medicago truncatula</i>  | Medtr2g024430.1             | LELCL     |
| <i>Medicago truncatula</i>  | Medtr4g154880.1             | LELCL     |
| <i>Prunus persica</i>       | ppa013410m                  | LELQL     |
| <i>Mimulus guttatus</i>     | mgv1a016361m                | LELPL     |
| <i>Mimulus guttatus</i>     | mgv1a016202m                | LDLRL     |
| <i>Vitis Vinifera</i>       | GSVIVT01021514001           | LELRL     |
| <i>Vitis Vinifera</i>       | GSVIVT01021516001           | LEVRL     |
| <i>Manihot esculenta</i>    | cassava4.1_026855m          | LELRL     |
| <i>Manihot esculenta</i>    | cassava4.1_019045m          | LELRL     |
| <i>Manihot esculenta</i>    | cassava4.1_018315m          | LELRL     |
| <i>Citrus sinensis</i>      | orange1.1g046141m           | LELRL     |
| <i>Aquilegia coerulea</i>   | AcoGoldSmith_v1.025874m     | LDLCL     |
| <i>Populus trichocarpa</i>  | POPTR_0006s02410.1          | LDLCL     |
| <i>Populus trichocarpa</i>  | POPTR_0011s02260.1          | LELRL     |
| <i>Eucalyptus grandis</i>   | Egrandis_v1_0.031045m       | LELRL     |
| <i>Citrus clementina</i>    | clementine0.9_025662m       | LELRL     |
| <i>Arabidopsis thaliana</i> | AT2G34600.1                 | LELRL     |
| <i>Arabidopsis thaliana</i> | AT1G30135.1                 | LELRL     |
